# Supplementary material
Source: HighWire-hosted journal article supplement (https://erj.ersjournals.com/content/61/5/2202226)
Supplement: inline-supplementary-material-1 [file inline-supplementary-material-1.pdf]

|                                      | All<br>n=71     | Mild<br>n=29   | Moderate<br>N=22 | Severe<br>n=20  | p value<br>( $<0.05$ ) |
|--------------------------------------|-----------------|----------------|------------------|-----------------|------------------------|
| Age                                  | 61.1<br>(2.0)   | 59.2<br>(3.7)  | 59.6<br>(3.3)    | 66.3<br>(3.1)   | NS                     |
| Sex<br>(M:F)                         | 1.1             | 1.01           | 0.82             | 1.71            | NS                     |
| Ethnicity<br>(Caucasian %)           | 87.3 %          | 92.6 %         | 68.2 %           | 100 %           | p<0.05                 |
| BMI                                  | 29.3<br>(1.1)   | 26.3<br>(2.1)  | 31.3<br>(2.2)    | 31.2<br>(1.8)   | NS                     |
| Hypertension                         | 41.4 %          | 63.2 %         | 50 %             | 40 %            | NS                     |
| IHD                                  | 5.6 %           | 3.4 %          | 13.6 %           | 5.0 %           | NS                     |
| Pulmonary <sup>†</sup>               | 16.9 %          | 24.1 %         | 9.1 %            | 15.0 %          | NS                     |
| Asthma                               | 22.5 %          | 17.2 %         | 27.3 %           | 26.3 %          | NS                     |
| Diabetes                             | 29.6 %          | 17.2 %         | 22.7 %           | 55.0 %          | p<0.05                 |
| Bacterial<br>infection               | 23.9 %          | 13.8 %         | 27.3 %           | 35.0 %          | NS                     |
| PE                                   | 5.6 %           | 3.4 %          | 4.5 %            | 10.0 %          | NS                     |
| AKI                                  | 8.5 %           | 10.3 %         | 0.0 %            | 15.0 %          | NS                     |
| CRP                                  | 121.8<br>(12.1) | 60.6<br>(15.3) | 136.4<br>(21.7)  | 220.5<br>(27.2) | p<0.001                |
| LOS<br>(days)                        | 23.7<br>(3.8)   | 24.4<br>(6.3)  | 13.1<br>(3.2)    | 35.9<br>(11.1)  | p<0.001                |
| 30 day mortality<br>(alive/deceased) | 12.7 %          | 0.0 %          | 0.0 %            | 45.0 %          | p<0.001                |

**Supplementary Figure 1.**

Acute (inpatient) cohort characteristics. Abbreviations as follow: IHD, ischaemic heart disease; BMI, body mass index; AKI, acute kidney injury; PE, pulmonary emboli; CRP, C-reactive protein; LOS, length of stay. † Pulmonary disease includes chronic pulmonary diseases excluding asthma. Values in ( ) represent standard error of the mean.



A

| Marker                           | Category              | Function                                                                                                                                                                        |
|----------------------------------|-----------------------|---------------------------------------------------------------------------------------------------------------------------------------------------------------------------------|
| CXCR1                            | Chemokine receptor    | Binds CXCL8/IL-8; migration to peripheral tissues via chemotaxis                                                                                                                |
| CXCR2                            | Chemokine receptor    | Binds CXCL8/IL-8; migration to peripheral tissues via chemotaxis                                                                                                                |
| CXCR4                            | Chemokine receptor    | Monocyte retention in bone marrow and infiltration of peripheral tissues                                                                                                        |
| CXCR6                            | Chemokine receptor    | Migration towards ligand CXCL16 which is expressed at high levels in the lung                                                                                                   |
| CCR7                             | Chemokine receptor    | Migration towards secondary lymphoid tissue                                                                                                                                     |
| CCR8                             | Chemokine receptor    | Migration towards secondary lymphoid tissue                                                                                                                                     |
| PSGL1                            | Adhesion molecule     | Facilitates leucocyte rolling on vascular endothelium to exit bloodstream                                                                                                       |
| CD62L/L-Selectin                 | Adhesion molecule     | Facilitates leucocyte tethering and rolling on vascular endothelium to exit bloodstream                                                                                         |
| CD31/PECAM-1                     | Adhesion molecule     | Facilitates leucocyte migration through vascular endothelial junctions/endothelial transmigration into peripheral tissues                                                       |
| Integrin $\beta 7$               | Integrin              | Dimerises with integrin $\alpha 4$ for leucocyte migration to mucosal tissues, towards MAdCAM-1 on mucosal epithelia, and interacts with extra-cellular matrix (ECM) components |
| VLA-4/Integrin $\alpha 4\beta 1$ | Integrin              | Facilitates leucocyte interactions with vascular endothelia and ECM components for migration through endothelial and connective tissue barriers                                 |
| TNF $\alpha$                     | Inflammatory mediator | Induced by pattern recognition receptor (PRR) mediated activation of monocytes, inflammatory immune responses and tissue repair                                                 |
| IL-1 $\beta$                     | Inflammatory mediator | Induced by pattern recognition receptor (PRR) mediated activation of monocytes, inflammatory immune responses and tissue repair                                                 |
| COX-2                            | Inflammatory mediator | Induced by pattern recognition receptor (PRR) mediated activation of monocytes, contributes to inflammation by generating prostaglandins from conversion of arachidonic acid.   |

B

Gated on CD45<sup>+</sup> LIVE SINGLETs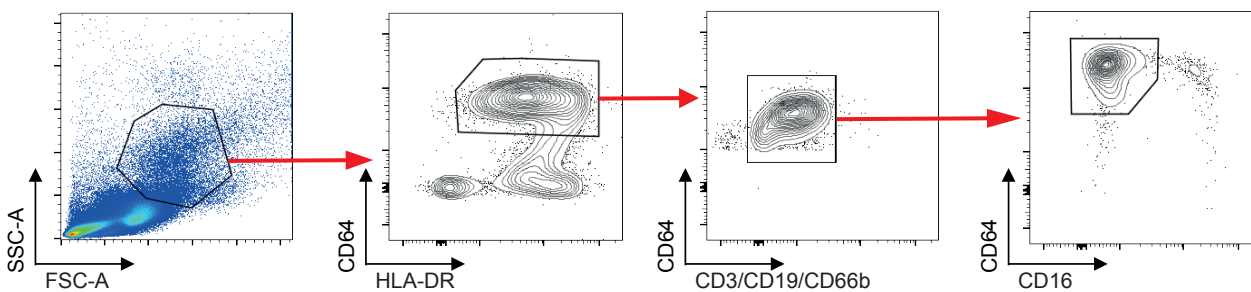

C

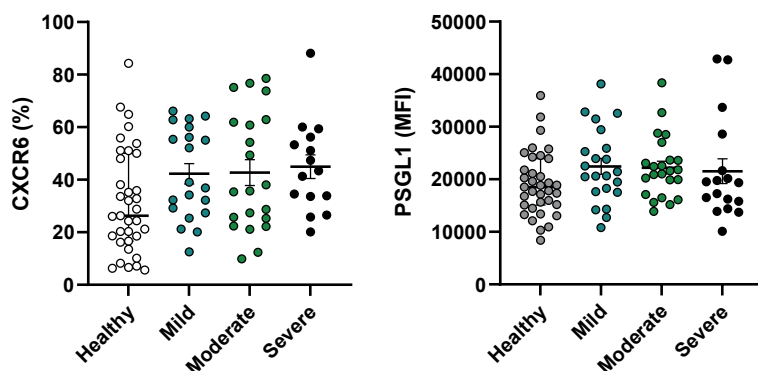

D

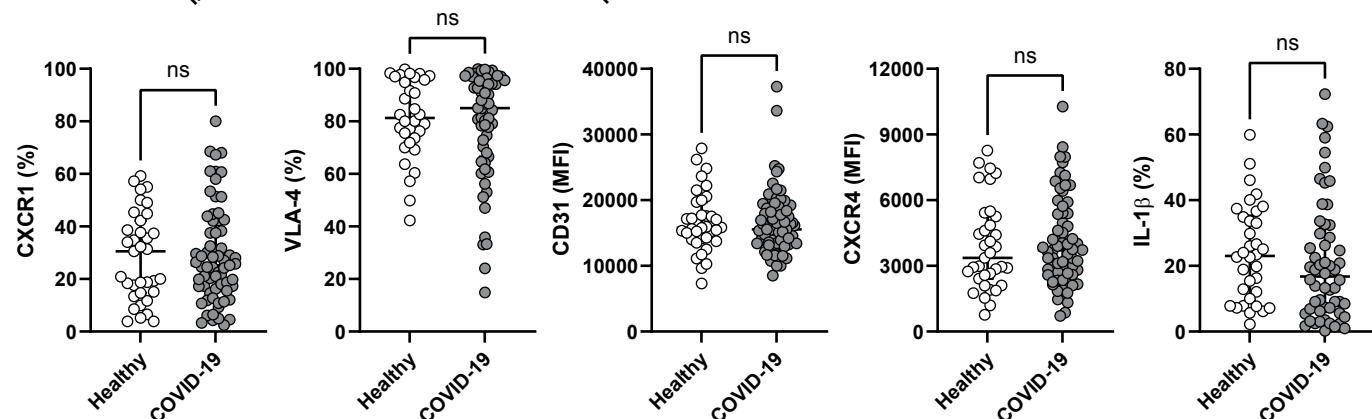

## Supplementary Figure 2.

**(A)** Table describing functions of leucocyte migration markers and inflammatory mediators produced in response to microbial stimulation, as assessed on monocytes in COVID-19 patients. **(B)** Representative FACS plots outlining flow cytometric gating strategy used for analysis of monocytes within PBMC samples: pre-gated on live CD45<sup>+</sup> cells, circulating classical CD14<sup>+</sup> monocytes were identified as HLA-DR<sup>+</sup>CD64<sup>+</sup> CD3<sup>-</sup>CD19<sup>-</sup>CD66b<sup>-</sup> CD16<sup>-</sup> cells expressing CD14. **(C)** Graphs show frequencies of CD14<sup>+</sup> monocytes expressing CXCR6 and CD14<sup>+</sup> monocyte expression level of PSGL-1 as determined by mean fluorescence intensity (MFI) from healthy individuals (n=35) and acute COVID-19 patients with mild (CXCR6: n=20; PSGL-1: n=22), moderate (CXCR6: n=21; PSGL-1: n=23) and severe (CXCR6: n=15; PSGL-1: n=17) disease. Graphs show individual patient data with bar representing median  $\pm$  interquartile range. Kruskal Wallis with Dunn's post hoc test. **(D)** Graphs show frequencies of CD14<sup>+</sup> monocytes expressing CXCR1, VLA-4 and producing IL-1 $\beta$  and CD14<sup>+</sup> monocyte levels of expression of CD31 and CXCR4 as determined by mean fluorescence intensity in healthy individuals (CXCR1: n=35; VLA-4: n=32; CD31: n=35; CXCR4: n=35; IL-1 $\beta$ : n=34) and total acute COVID-19 patients (CXCR1: n=67; VLA-4: n=59; CD31: n=67; CXCR4: n=66; IL-1 $\beta$ : n=56). Graphs show individual patient data with bar representing mean  $\pm$  standard error of the mean (CD31, CXCR4) or median  $\pm$  interquartile range (CXCR1, VLA-4, IL-1 $\beta$ ). Unpaired *t*-test (CD31, CXCR4), Mann-Whitney test (CXCR1, VLA-4, IL-1 $\beta$ ).

S.Fig.3

## CONVALESCENT CHARACTERISTICS

|                             | All<br>(n=142) | No<br>breathlessness<br>(n=70) | Shortness of<br>breath<br>(n=68) | No fatigue<br>(n=73) | Fatigue<br>(n=63) | p value (<0.05) |         |
|-----------------------------|----------------|--------------------------------|----------------------------------|----------------------|-------------------|-----------------|---------|
|                             |                |                                |                                  |                      |                   | SOB             | Fatigue |
| Mild (n= )                  | 28             | 18                             | 10                               | 14                   | 12                |                 |         |
| Moderate (n= )              | 50             | 20                             | 27                               | 26                   | 22                |                 |         |
| Severe (n= )                | 64             | 32                             | 29                               | 33                   | 28                | NS              | NS      |
| Age                         | 58.3<br>(1.1)  | 57.4<br>(1.6)                  | 59.1<br>(1.5)                    | 58.5<br>(1.6)        | 58.1<br>(1.5)     | NS              | NS      |
| Sex<br>(M:F)                | 1.73           | 1.69                           | 1.77                             | 1.68                 | 1.72              | NS              | NS      |
| Ethnicity<br>(Caucasian %)  | 76.8 %         | 67.1 %                         | 86.1 %                           | 76.0 %               | 77.9 %            | <0.01           | NS      |
| BMI                         | 31.1<br>(0.5)  | 30.4<br>(0.8)                  | 31.8<br>(0.6)                    | 31.5<br>(0.7)        | 30.8<br>(0.7)     | NS              | NS      |
| Hypertension                | 34.5 %         | 34.3 %                         | 34.7 %                           | 33.8 %               | 34.7 %            | NS              | NS      |
| IHD                         | 9.2 %          | 8.6 %                          | 9.7 %                            | 12.1 %               | 5.9 %             | NS              | NS      |
| Pulmonary <sup>†</sup>      | 12.0 %         | 12.9 %                         | 11.1 %                           | 16.0 %               | 7.4 %             | NS              | NS      |
| Asthma                      | 21.8 %         | 17.1 %                         | 26.4 %                           | 18.7 %               | 26.5 %            | NS              | NS      |
| Diabetes                    | 12.7 %         | 14.3 %                         | 11.1 %                           | 13.3 %               | 11.8 %            | NS              | NS      |
| Bacterial infection         | 14.8 %         | 12.9 %                         | 16.7 %                           | 17.3 %               | 13.2 %            | NS              | NS      |
| PE                          | 4.2 %          | 7.1 %                          | 1.4 %                            | 4.0 %                | 4.4 %             | NS              | NS      |
| AKI                         | 7.8 %          | 2.86 %                         | 12.5 %                           | 8.5 %                | 7.4 %             | NS              | NS      |
| CRP                         | 161.6<br>(9.6) | 160<br>(13.8)                  | 164<br>(15.3)                    | 159<br>(15.6)        | 164<br>(13.6)     | NS              | NS      |
| Length of stay              | 15.7<br>(1.8)  | 16.3<br>(3.0)                  | 15.0<br>(1.9)                    | 12.4<br>(1.7)        | 18.6<br>(3.0)     | NS              | NS      |
| Time to follow up<br>(days) | 151.4<br>(3.4) | 150<br>(4.7)                   | 152<br>(5.0)                     | 159<br>(5.2)         | 145<br>(4.5)      | NS              | <0.05   |
| Radiology<br>(abnormal %)   | 31.0 %         | 22.9 %                         | 44.4 %                           | 30.7 %               | 38.2 %            | <0.01           | NS      |

**Supplementary Figure 3.**

Convalescent COVID-19 follow up cohort lung function tests at the time of their outpatient visit. 102 of 142 patients had lung function performed. Results are presented according to the presence, or absence, of new fatigue, shortness of breath or radiological abnormality at the time of follow up. Units of measurement: FEV<sub>1</sub>, litres/min; FVC, litres; millilitres CO/minute/mm Hg. Values in ( ) represent standard error of the mean. % predicted is a comparison to the GLI (2017) reference values.

|                                                  | FEV <sub>1</sub> | FEV <sub>1</sub><br>%<br>predicted | FVC            | FVC<br>%<br>predicted | FEV <sub>1</sub> /FVC<br>% | DLCO           | DLCO<br>%<br>predicted |
|--------------------------------------------------|------------------|------------------------------------|----------------|-----------------------|----------------------------|----------------|------------------------|
| <b>All<br/>(n=102)</b>                           | 2.73<br>(0.08)   | 87.9<br>(2.14)                     | 3.51<br>(0.10) | 90.9<br>(1.71)        | 78.2<br>(0.90)             | 6.84<br>(0.35) | 87.9<br>(1.66)         |
| <b>Lung function- breathlessness outcome</b>     |                  |                                    |                |                       |                            |                |                        |
| <b>No breathlessness<br/>(n=44)</b>              | 2.83<br>(0.13)   | 93.2<br>(2.97)                     | 3.58<br>(0.16) | 93.7<br>(2.89)        | 79.1<br>(1.35)             | 6.64<br>(0.44) | 86.6<br>(2.76)         |
| <b>Shortness of breath<br/>(n=58)</b>            | 2.65<br>(0.09)   | 84.0<br>(2.97)                     | 3.45<br>(0.12) | 88.8<br>(2.08)        | 77.4<br>(1.24)             | 6.97<br>(0.54) | 88.8<br>(2.23)         |
| <b>Breathlessness<br/>p value (&lt;0.05)</b>     | NS               | <0.05                              | NS             | NS                    | NS                         | NS             | NS                     |
| <b>Lung function- fatigue outcome</b>            |                  |                                    |                |                       |                            |                |                        |
| <b>No fatigue<br/>(n=46)</b>                     | 2.67<br>(0.12)   | 86.5<br>(2.55)                     | 3.39<br>(0.16) | 87.3<br>(2.66)        | 79.2<br>(1.39)             | 6.08<br>(0.45) | 94.1<br>(2.89)         |
| <b>Fatigue<br/>(n=56)</b>                        | 2.78<br>(0.09)   | 89.1<br>(3.34)                     | 3.60<br>(0.12) | 93.8<br>(2.21)        | 77.3<br>(1.21)             | 7.40<br>(0.53) | 89.3<br>(2.01)         |
| <b>Fatigue p value<br/>(&lt;0.05)</b>            | NS               | NS                                 | NS             | 0.06                  | NS                         | 0.07           | NS                     |
| <b>Lung function-radiological outcome</b>        |                  |                                    |                |                       |                            |                |                        |
| <b>Radiology resolved<br/>(n=63)</b>             | 2.75<br>(0.10)   | 87.7<br>(3.01)                     | 3.56<br>(0.13) | 92.4<br>(2.16)        | 77.3<br>(1.2)              | 7.44<br>(0.51) | 90.0<br>(2.13)         |
| <b>Radiology abnormal<br/>(n=39)</b>             | 2.69<br>(0.11)   | 88.3<br>(2.70)                     | 3.40<br>(0.14) | 88.3<br>(2.74)        | 79.6<br>(1.3)              | 5.88<br>(0.35) | 84.6<br>(2.56)         |
| <b>Abnormal radiology<br/>p value (&lt;0.05)</b> | NS               | NS                                 | NS             | NS                    | NS                         | <0.05          | 0.06                   |

**Supplementary Figure 4.**

Convalescent COVID-19 follow up cohort lung function tests at the time of their outpatient visit. 102 of 142 patients had lung function performed. Results are presented according to the presence, or absence, of new fatigue, shortness of breath or radiological abnormality at the time of follow up. Units of measurement: FEV1, litres/min; FVC, litres; millilitres CO/minute/mm Hg. Values in ( ) represent standard error of the mean. % predicted is a comparison to the GLI (2017) reference values.

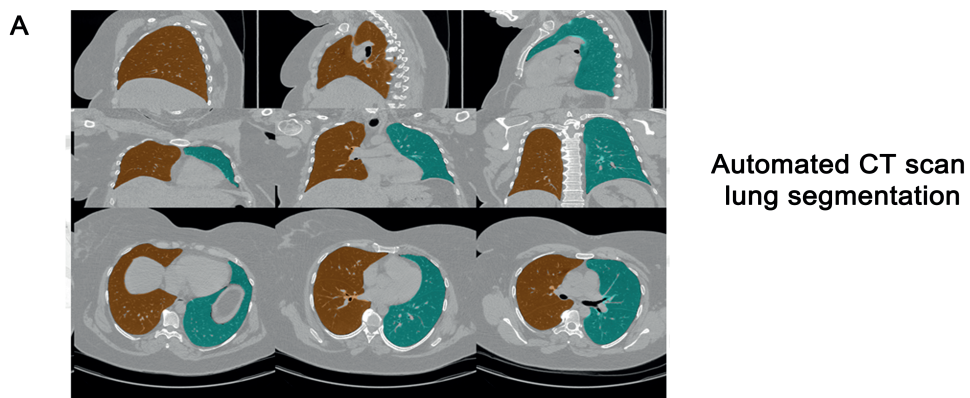

Lung texture analysis (LTA)

B Asymptomatic

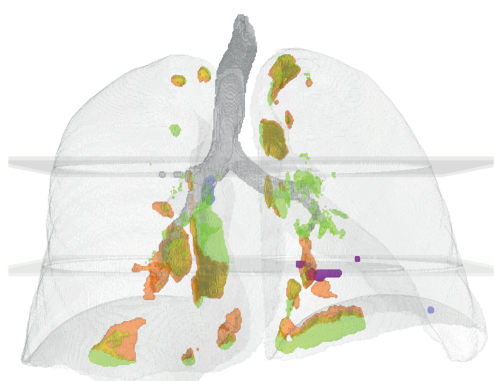

■ Hyperlucency ■ Ground glass

Symptomatic

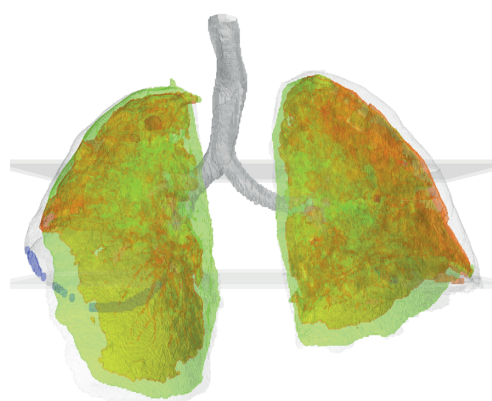

■ Reticulations ■ Honeycombing

C

Lung density analysis (LDA)

Asymptomatic

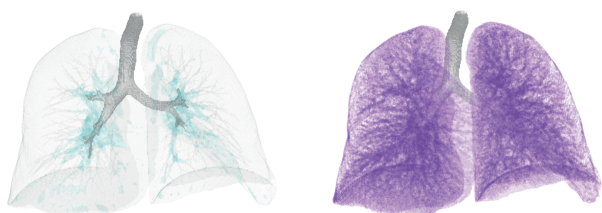

■ Very high density ■ High density

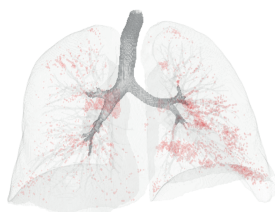

■ Low density

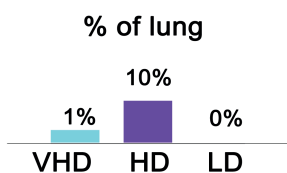

Symptomatic

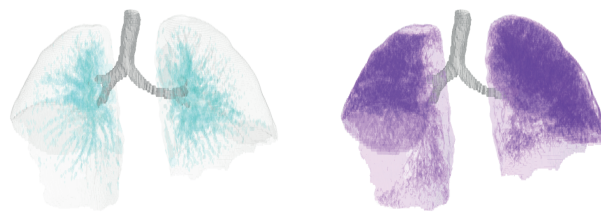

■ Very high density ■ High density

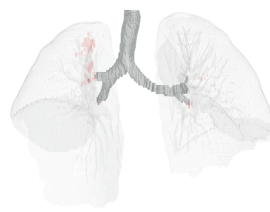

■ Low density

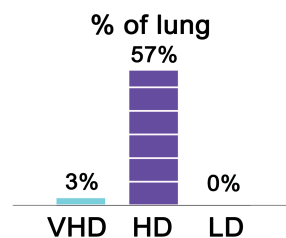

### **Supplementary Figure 5.**

Quantitative CT analysis in symptomatic convalescent COVID-19 patients. CT scan images from 12 convalescent patients with breathlessness and/or fatigue, taken at outpatient follow up appointments, were analysed using lung texture analysis and lung densitometry analysis+ software algorithms (Imbio, USA). **(A)** Automated lung segmentation in sagittal (top row), coronal (middle row) and transverse (bottom row) planes. **(B)** Example of lung texture analysis in asymptomatic (no breathlessness or fatigue) and symptomatic (breathless and/or fatigued) patients enabling identification of types of lung damage including hyperlucency, ground glass changes, reticulations and honeycombing. **(C)** Example of lung density analysis in asymptomatic and symptomatic patients, enabling identification of high density and very high density representing ground glass changes and inflammation, respectively. On average, 57% of lungs of symptomatic patients displayed high density changes (ground glass changes) compared to 10% of asymptomatic patients.



A

| Symptomatic post COVID-19 quantitative CT thorax<br>(n=12) |                                            |                                         |
|------------------------------------------------------------|--------------------------------------------|-----------------------------------------|
| Demographics                                               | Age (years)                                | 58.9 (6.9)                              |
|                                                            | Sex (Male %)                               | 62.5                                    |
|                                                            | Ethnicity (% white)                        | 75                                      |
|                                                            | BMI                                        | 30.7 (3.69)                             |
| Acute data                                                 | Inpatient severity (% total)               | Mild 12.5<br>Moderate 37.5<br>Severe 50 |
|                                                            | FiO <sub>2</sub> 0.21-0.28                 |                                         |
|                                                            | FiO <sub>2</sub> 0.28-0.6                  |                                         |
|                                                            | FiO <sub>2</sub> >0.6                      |                                         |
|                                                            | CRP                                        | 166.5 (125.4)                           |
|                                                            | Length of stay (days)                      | 18.8 (14.1)                             |
| Comorbidities                                              | Hypertension (%)                           | 62.5                                    |
|                                                            | IHD (%)                                    | 25.0                                    |
|                                                            | Chronic pulmonary disease <sup>†</sup> (%) | 25                                      |
|                                                            | Asthma (%)                                 | 25                                      |
|                                                            | Diabetes (%)                               | 12.5                                    |
| Follow up data                                             | Abnormal radiology at follow up (%)        | 62.5                                    |
|                                                            | Breathless at follow up                    | 50                                      |
|                                                            | Fatigue at follow up                       | 62.5                                    |
|                                                            | Time to follow up (days)                   | 143 (40.9)                              |

B

| Symptomatic post COVID-19 quantitative CT thorax<br>(n=12) |                                   |                   |
|------------------------------------------------------------|-----------------------------------|-------------------|
| Quantitative CT Analysis                                   | Hyperlucency, total %             | 0 (0, 1)          |
|                                                            | Hyperlucency, maximum focal %     | 2 (0, 3.25)       |
|                                                            | Ground glass, total %             | 30.5 (2, 65.8)    |
|                                                            | Ground glass, maximum focal %     | 56 (4.25, 91)     |
|                                                            | Reticulation, total %             | 7.5 (2.25, 13.75) |
|                                                            | Reticulation, maximum focal %     | 13 (2, 19.5)      |
|                                                            | Honeycombing, total %             | 0 (0, 0)          |
|                                                            | Honeycombing, maximum focal %     | 0 (0, 0)          |
|                                                            | Low density total %               | 1 (0-4)           |
|                                                            | Low density maximum focal %       | 0 (0-5)           |
|                                                            | High density total %              | 30 (13-49)        |
|                                                            | High density maximum focal %      | 39 (13-65)        |
|                                                            | Very high density total %         | 2 (1-3)           |
|                                                            | Very high density maximum total % | 3 (3-5)           |
| CT follow-up time, days                                    | 157.8 (28.7)                      |                   |

**Supplementary Figure 6.**

**(A)** Convalescent COVID-19 follow up patient information for quantitative CT analysis. Abbreviations as follow: IHD, ischaemic heart disease; BMI, body mass index; CRP, C-reactive protein; † Pulmonary disease includes chronic pulmonary diseases excluding asthma. Values in ( ) represent standard error of the mean. **(B)** Different types of lung damage in 12 symptomatic convalescent COVID-19 patients as generated by automated quantitative CT analysis.

A

|                             | Controls<br>(n=17) | Viral<br>(n=10) | PFILD<br>(n=14) |
|-----------------------------|--------------------|-----------------|-----------------|
| Mild (n= )                  |                    | 5               |                 |
| Moderate (n= )              |                    | 4               |                 |
| Severe (n= )                |                    | 1               |                 |
| Age                         | 52.9<br>(4.4)      | 56<br>(5.7)     | 73.5<br>(1.5)   |
| Sex<br>(M:F)                | 0.47               | 1.0             | 3.67            |
| Ethnicity<br>(Caucasian %)  | 100.0              | 60.0            | 92.9            |
| BMI                         | 25.0<br>(0.86)     | 29.8<br>(3.4)   | 31.3<br>(2.1)   |
| Hypertension                | 11.8 %             | 20.0 %          | 53.8 %          |
| IHD                         | 0.0 %              | 10.0 %          | 14.3 %          |
| Pulmonary <sup>†</sup>      | 35.3 %             | 30.0 %          | 42.9 %          |
| Asthma                      | 0.0 %              | 40.0 %          | 21.4 %          |
| Diabetes                    | 0.0 %              | 20.0 %          | 14.3 %          |
| CRP                         |                    | 47.2<br>(13.6)  |                 |
| Length of stay<br>(days)    |                    | 6.7<br>(2.3)    |                 |
| Time to follow up<br>(days) |                    | 155.1<br>(7.8)  |                 |
| Breathless (%)              | 0.0                | 50.0            | 100.0           |
| Fatigue (%)                 | 0.0                | 40.0            | 21.4            |

B

|                 | FEV <sub>1</sub> | FEV <sub>1</sub><br>% predicted | FVC            | FVC<br>% predicted | FEV <sub>1</sub> /FVC<br>% | DLCO           | DLCO<br>% predicted |
|-----------------|------------------|---------------------------------|----------------|--------------------|----------------------------|----------------|---------------------|
| PFILD<br>(n=13) | 2.23<br>(0.18)   | 83.3<br>(4.2)                   | 2.68<br>(0.21) | 77.8<br>(3.69)     | 87.5<br>(4.48)             | 3.51<br>(0.30) | 50.4<br>(4.28)      |

**Supplementary Figure 7.**

**(A)** Control, viral (n=4 Influenza A, n=6 Respiratory Syncytial Virus) and progressive fibrosing interstitial lung disease (PFILD) characteristics. Abbreviations as follow: IHD, ischaemic heart disease; BMI, body mass index; CRP, C-reactive protein; LOS, length of stay. † Pulmonary disease includes chronic pulmonary diseases excluding asthma. Values in ( ) represent standard error of the mean. **(B)** PFILD lung function tests at the time of diagnosis of progressive phenotype. Units of measurement: FEV<sub>1</sub>, litres/min; FVC, litres; millilitres CO/minute/mm Hg. Values in ( ) represent standard error of the mean. % predicted is a comparison to the GLI (2017) reference values.

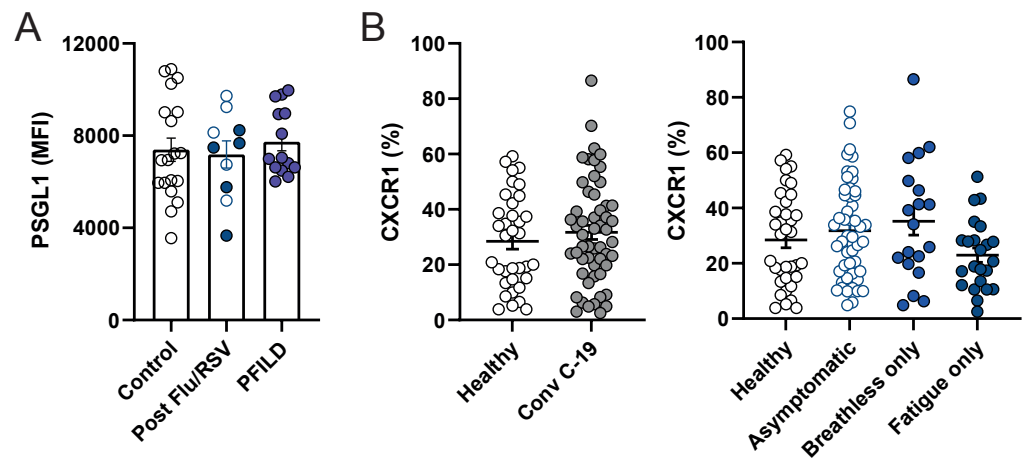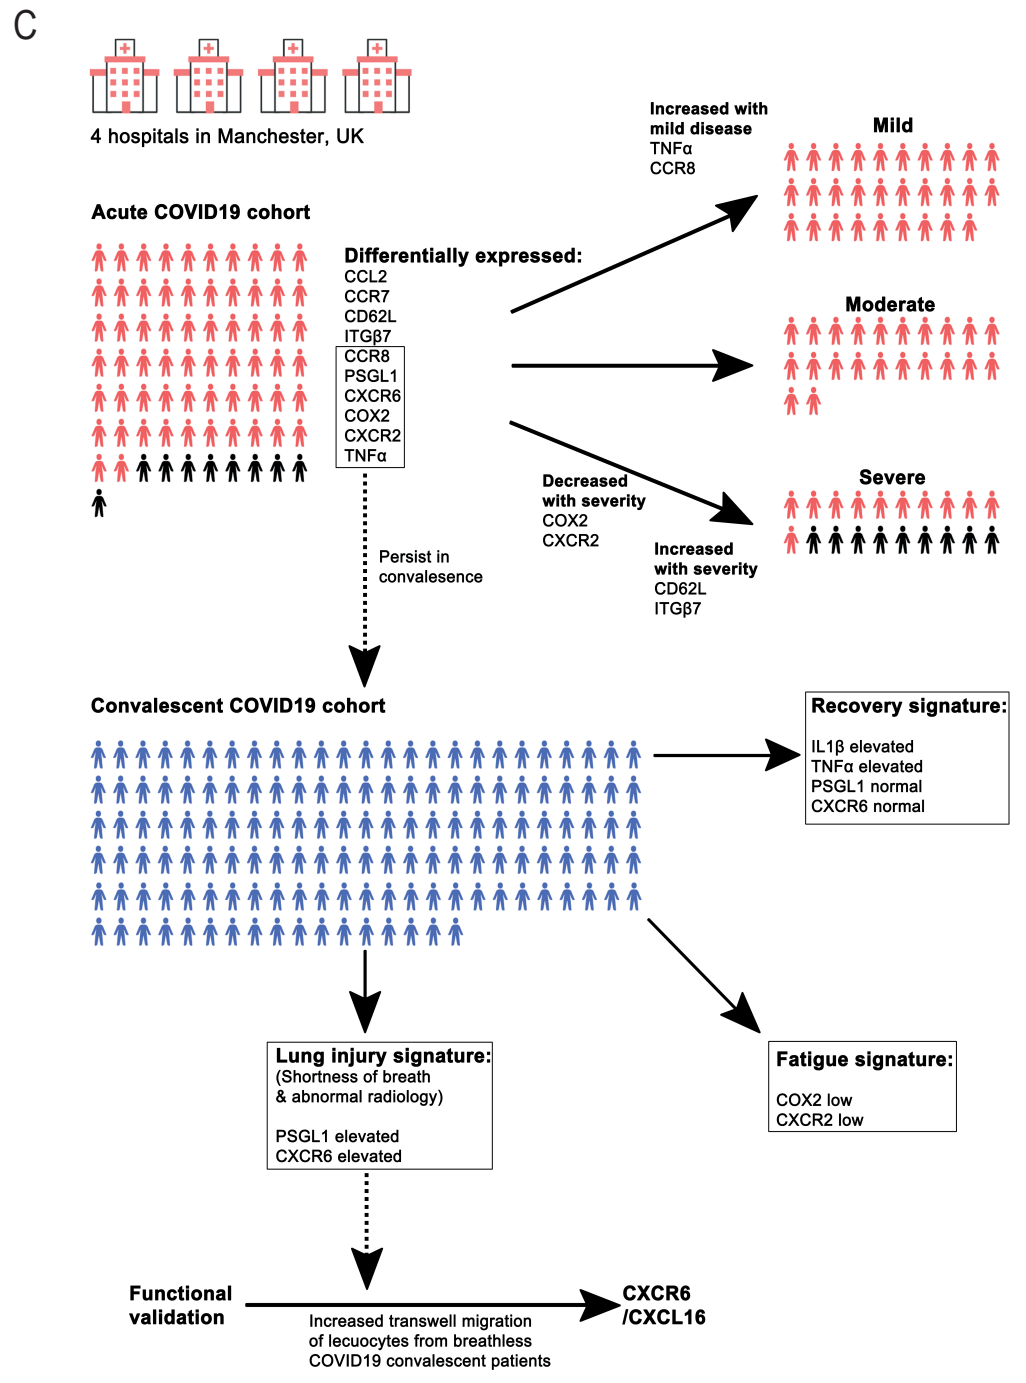

### Supplementary Figure 8.

**(A)** Graph showing CD14<sup>+</sup> monocyte expression level of PSGL-1 as determined by mean fluorescence intensity (MFI) from healthy individuals (n=19), total convalescent flu/RSV patients (n=10) and total PFILD patients (n=14). Patients with convalescent flu/RSV were stratified into breathless (n=5, filled circles) and not breathless (n=5, open circles) within the same group. Graphs show individual patient data with bar representing median  $\pm$  interquartile range. Kruskal Wallis with Dunn's post hoc test. **(B)** Graphs show frequencies of CD14<sup>+</sup> monocytes expressing CXCR1 from healthy individuals (n=35) and total convalescent COVID-19 patients (n=133). Patients with convalescent COVID-19 were also stratified into asymptomatic (no breathlessness or fatigue: n=51), breathless only (breathless but not fatigued: n=19), fatigue only (fatigued but not breathless: n=23). Graphs show individual patient data with bar representing mean  $\pm$  S.E.M. Unpaired *t*-test (healthy versus convalescent COVID-19), One-way ANOVA with Holm-Sidak post hoc test (long COVID symptoms). **(C)** Summary schematic demonstrating severity-specific abnormal monocyte features in acute COVID-19 and distinct monocyte signatures corresponding to specific long COVID phenotypes.
