# Supplementary material
Source: HighWire-hosted journal article supplement (https://erj.ersjournals.com/content/61/5/2202226)
Supplement: inline-supplementary-material-2 [file inline-supplementary-material-2.pdf]

| <b>Antibody</b>    | <b>Clone</b> | <b>Company</b> |
|--------------------|--------------|----------------|
| CD45               | 2D1          | Biolegend      |
| CD64               | 10.1         | Biolegend      |
| HLA-DR             | L234         | Biolegend      |
| CD3                | UCHT1        | Biolegend      |
| CD19               | H1B19        | Biolegend      |
| CD66b              | G10F5        | Biolegend      |
| CD14               | 63D3         | Biolegend      |
| CD16               | 3G8          | Biolegend      |
| CXCR1              | 8F1          | Biolegend      |
| CXCR2              | 5E8          | Biolegend      |
| CXCR4              | 12G5         | Biolegend      |
| CXCR6              | K041E5       | Biolegend      |
| CCR7               | G043H7       | Biolegend      |
| CCR8               | L263G8       | Biolegend      |
| CCL2/MCP-1         | 5D3-F7       | Biolegend      |
| PSGL-1             | KPL-1        | Biolegend      |
| CD62L              | DREG-56      | Biolegend      |
| Integrin $\beta$ 7 | FIB504       | Biolegend      |
| VLA-4/CD49d        | 9F10         | Biolegend      |
| CD31/PECAM-1       | WM59         | Biolegend      |
| IL-1 $\beta$       | H1b-98       | Biolegend      |
| TNF $\alpha$       | Mab11        | BD Biosciences |
| COX-2              | G10F5        | BD Biosciences |
