# Supplementary material
Source: HighWire-hosted journal article supplement (https://erj.ersjournals.com/content/61/5/2202226)
Supplement: inline-supplementary-material-3 [file inline-supplementary-material-3.pdf]

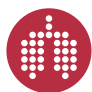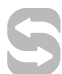

SHAREABLE PDF

# Monocyte migration profiles define disease severity in acute COVID-19 and unique features of long COVID

Nicholas A. Scott <sup>1,13</sup>, Laurence Pearmain <sup>2,3,4,13</sup>, Sean B. Knight <sup>1,5</sup>, Oliver Brand <sup>1</sup>, David J. Morgan <sup>1b</sup>, Christopher Jagger <sup>1</sup>, Sarah Harbach <sup>1</sup>, Saba Khan <sup>1</sup>, Halima A. Shuwa <sup>1</sup>, Miriam Franklin <sup>1</sup>, Verena Kästele <sup>1</sup>, Thomas Williams <sup>1</sup>, Ian Prise <sup>1</sup>, Flora A. McClure <sup>1</sup>, Pamela Hackney <sup>6</sup>, Lara Smith <sup>6</sup>, Madhvi Menon <sup>1</sup>, Joanne E. Konkel <sup>1</sup>, Criag Lawless <sup>4</sup>, James Wilson <sup>7,8</sup>, Alexander G. Mathioudakis <sup>2,9</sup>, Stefan C. Stanel <sup>2,9</sup>, Andrew Ustianowski <sup>1,7</sup>, Gabriella Lindergard <sup>7</sup>, Seema Brij <sup>10</sup>, Nawar Diar Bakerly <sup>1b5</sup>, Paul Dark <sup>5</sup>, Christopher Brightling <sup>11</sup>, Pilar Rivera-Ortega <sup>2</sup>, Graham M. Lord <sup>1</sup>, Alex Horsley <sup>1b9</sup>, CIRCO, Karen Piper Hanley <sup>3,4</sup>, Timothy Felton <sup>9</sup>, Angela Simpson <sup>9</sup>, John R. Grainger <sup>1b1,14</sup>, Tracy Hussell <sup>1,14</sup> and Elizabeth R. Mann <sup>1,12,14</sup>

<sup>1</sup>Lydia Becker Institute of Immunology and Inflammation, Division of Infection, Immunity and Respiratory Medicine, School of Biological Sciences, Faculty of Biology, Medicine and Health, University of Manchester, Manchester Academic Health Science Centre, Manchester, UK. <sup>2</sup>North West Lung Centre, Wythenshawe Hospital, Manchester University NHS Foundation Trust, Manchester, UK. <sup>3</sup>Division of Diabetes, Endocrinology and Gastroenterology, Faculty of Biology, Medicine and Health, University of Manchester, Manchester Academic Health Science Centre, Manchester, UK. <sup>4</sup>Wellcome Centre for Cell-Matrix Research, Faculty of Biology, Medicine and Health, Manchester Academic Health Science Centre, University of Manchester, Manchester, UK. <sup>5</sup>Department of Respiratory Medicine, Salford Royal NHS Foundation Trust, Manchester, UK. <sup>6</sup>Research Innovation, Manchester University NHS Foundation Trust, Manchester, UK. <sup>7</sup>Regional Infectious Diseases Unit, North Manchester General Hospital, Manchester, UK. <sup>8</sup>Department of Microbiology, Salford Royal NHS Foundation Trust, Manchester, UK. <sup>9</sup>Division of Infection, Immunity and Respiratory Medicine, Manchester NIHR BRC, Education and Research Centre, Wythenshawe Hospital, Manchester, UK. <sup>10</sup>Department of Respiratory Medicine, Manchester Royal Infirmary, Manchester University NHS Foundation Trust, Manchester, UK. <sup>11</sup>Department of Respiratory Sciences, Leicester NIHR BRC, University of Leicester, Leicester, UK. <sup>12</sup>Maternal and Fetal Health Centre, Division of Developmental Biology, School of Medical Sciences, Faculty of Biology, Medicine and Health, University of Manchester, Manchester, UK. <sup>13</sup>Equal contribution. <sup>14</sup>Joint senior authors.

Corresponding author: Elizabeth R. Mann ([elizabeth.mann@manchester.ac.uk](mailto:elizabeth.mann@manchester.ac.uk))

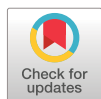

Shareable abstract (@ERSpublications)

**Immune dysfunction is a key factor in acute COVID-19 pathophysiology, with monocyte abnormalities sustained during convalescence for at least 9 months following hospital discharge and corresponding to specific long COVID symptoms** <https://bit.ly/3xEIY0H>

**Cite this article as:** Scott NA, Pearmain L, Knight SB, *et al.* Monocyte migration profiles define disease severity in acute COVID-19 and unique features of long COVID. *Eur Respir J* 2023; 61: 2202226 [DOI: 10.1183/13993003.02226-2022].

This single-page version can be shared freely online.

Copyright ©The authors 2023.

This version is distributed under the terms of the Creative Commons Attribution Non-Commercial Licence 4.0. For commercial reproduction rights and permissions contact [permissions@ersnet.org](mailto:permissions@ersnet.org)

This article has an editorial commentary:  
<https://doi.org/10.1183/13993003.00409-2023>

## Abstract

**Background** COVID-19 is associated with a dysregulated immune response but it is unclear how immune dysfunction contributes to the chronic morbidity persisting in many COVID-19 patients during convalescence (long COVID).

**Methods** We assessed phenotypical and functional changes of monocytes in COVID-19 patients during hospitalisation and up to 9 months of convalescence following COVID-19, respiratory syncytial virus or influenza A. Patients with progressive fibrosing interstitial lung disease were included as a positive control for severe, ongoing lung injury.

**Results** Monocyte alterations in acute COVID-19 patients included aberrant expression of leukocyte migration molecules, continuing into convalescence (n=142) and corresponding with specific symptoms of long COVID. Long COVID patients with unresolved lung injury, indicated by sustained shortness of breath and abnormal chest radiology, were defined by high monocyte expression of C-X-C motif chemokine receptor 6 (CXCR6) (p<0.0001) and adhesion molecule P-selectin glycoprotein ligand 1 (p<0.01), alongside preferential migration of monocytes towards the CXCR6 ligand C-X-C motif

Received: 19 May 2022  
Accepted: 16 Feb 2023

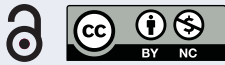

chemokine ligand 16 (CXCL16) ( $p < 0.05$ ), which is abundantly expressed in the lung. Monocyte CXCR6 and lung CXCL16 were heightened in patients with progressive fibrosing interstitial lung disease ( $p < 0.001$ ), confirming a role for the CXCR6–CXCL16 axis in ongoing lung injury. Conversely, monocytes from long COVID patients with ongoing fatigue exhibited a sustained reduction of the prostaglandin-generating enzyme cyclooxygenase 2 ( $p < 0.01$ ) and CXCR2 expression ( $p < 0.05$ ). These monocyte changes were not present in respiratory syncytial virus or influenza A convalescence.

**Conclusions** Our data define unique monocyte signatures that define subgroups of long COVID patients, indicating a key role for monocyte migration in COVID-19 pathophysiology. Targeting these pathways may provide novel therapeutic opportunities in COVID-19 patients with persistent morbidity.
